# Supplementary material
Source: PubMed Central journal article supplement (PMC307562)

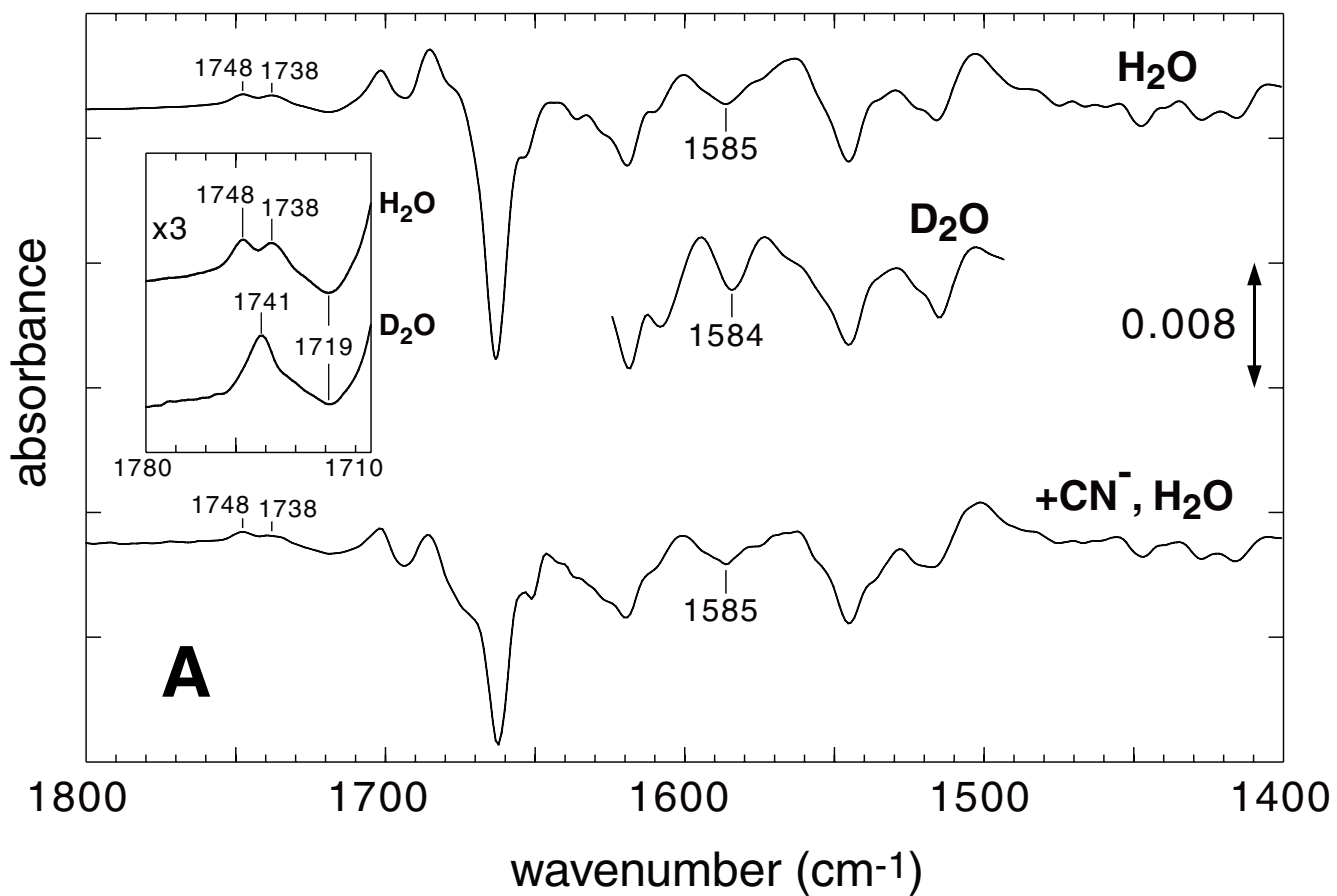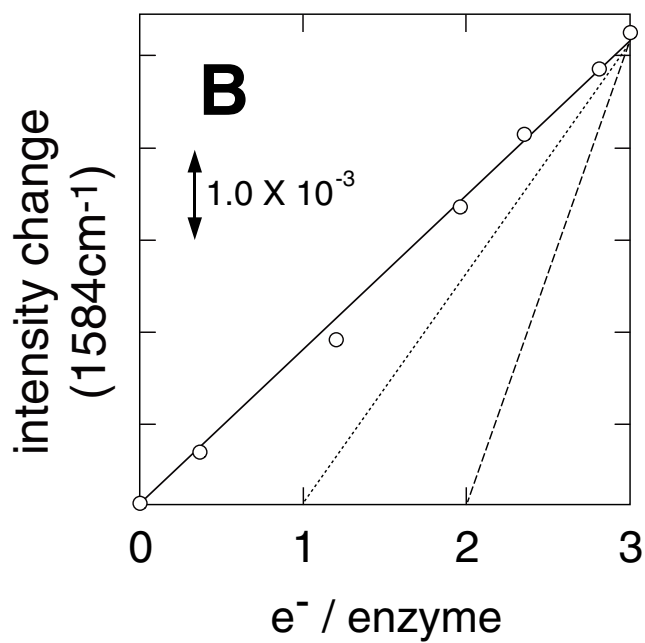

Supplement: pnas_100_26_15304__3.pdf [file pnas_100_26_15304__3.pdf]

**A**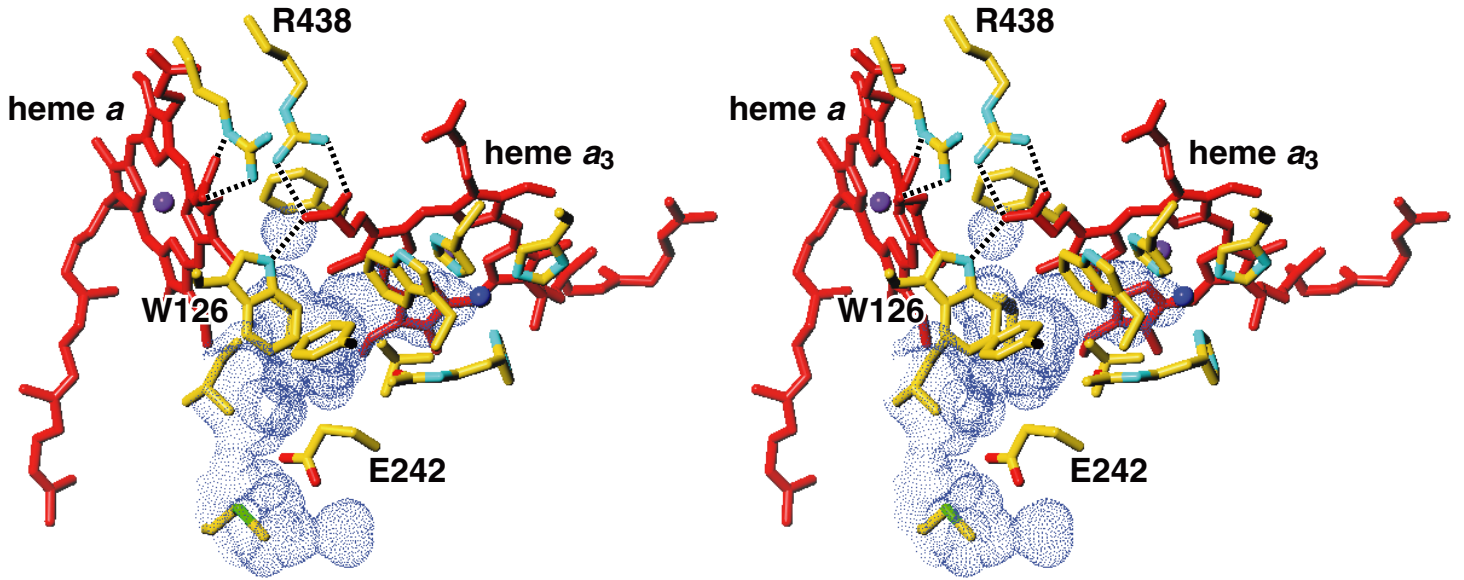**B**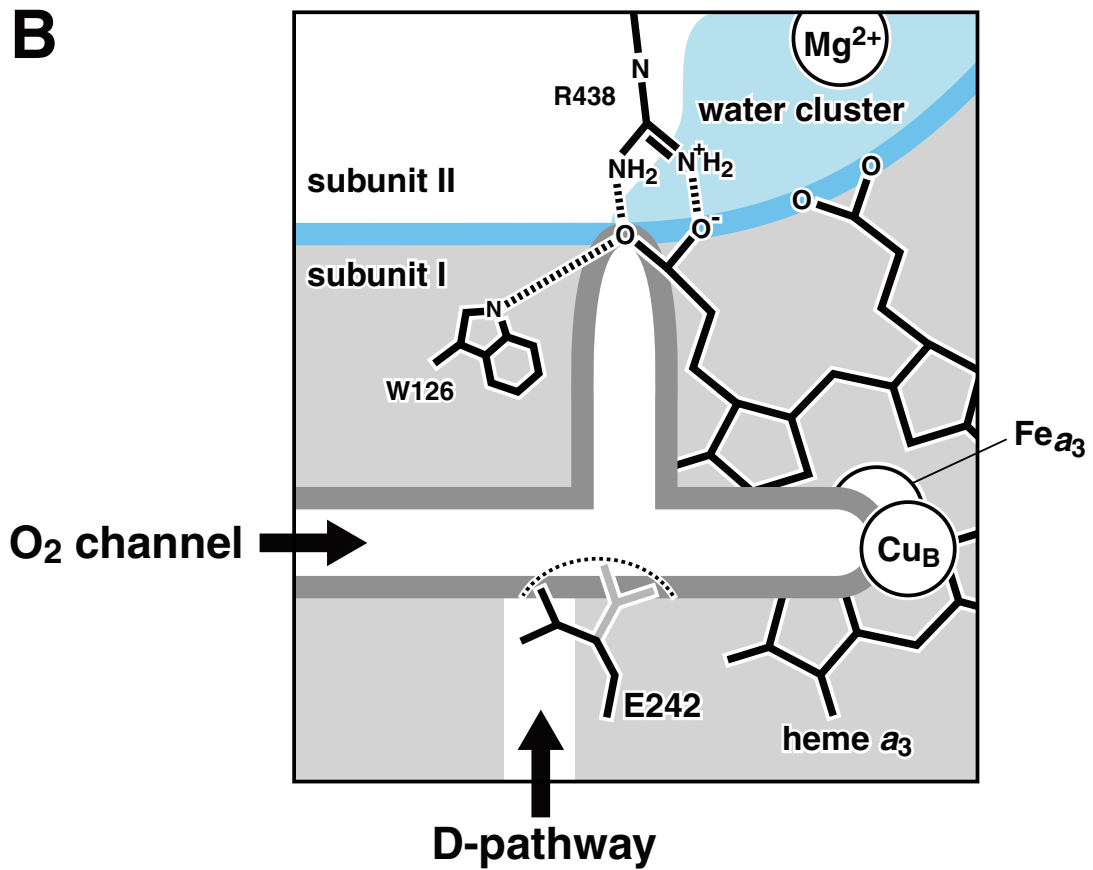

Supplement: pnas_100_26_15304__5.pdf [file pnas_100_26_15304__5.pdf]
